# Supplementary material
Source: PubMed Central journal article supplement (PMC8222194)
Supplement: NIHMS1697813-supplement-3.pdf [file NIHMS1697813-supplement-3.pdf]

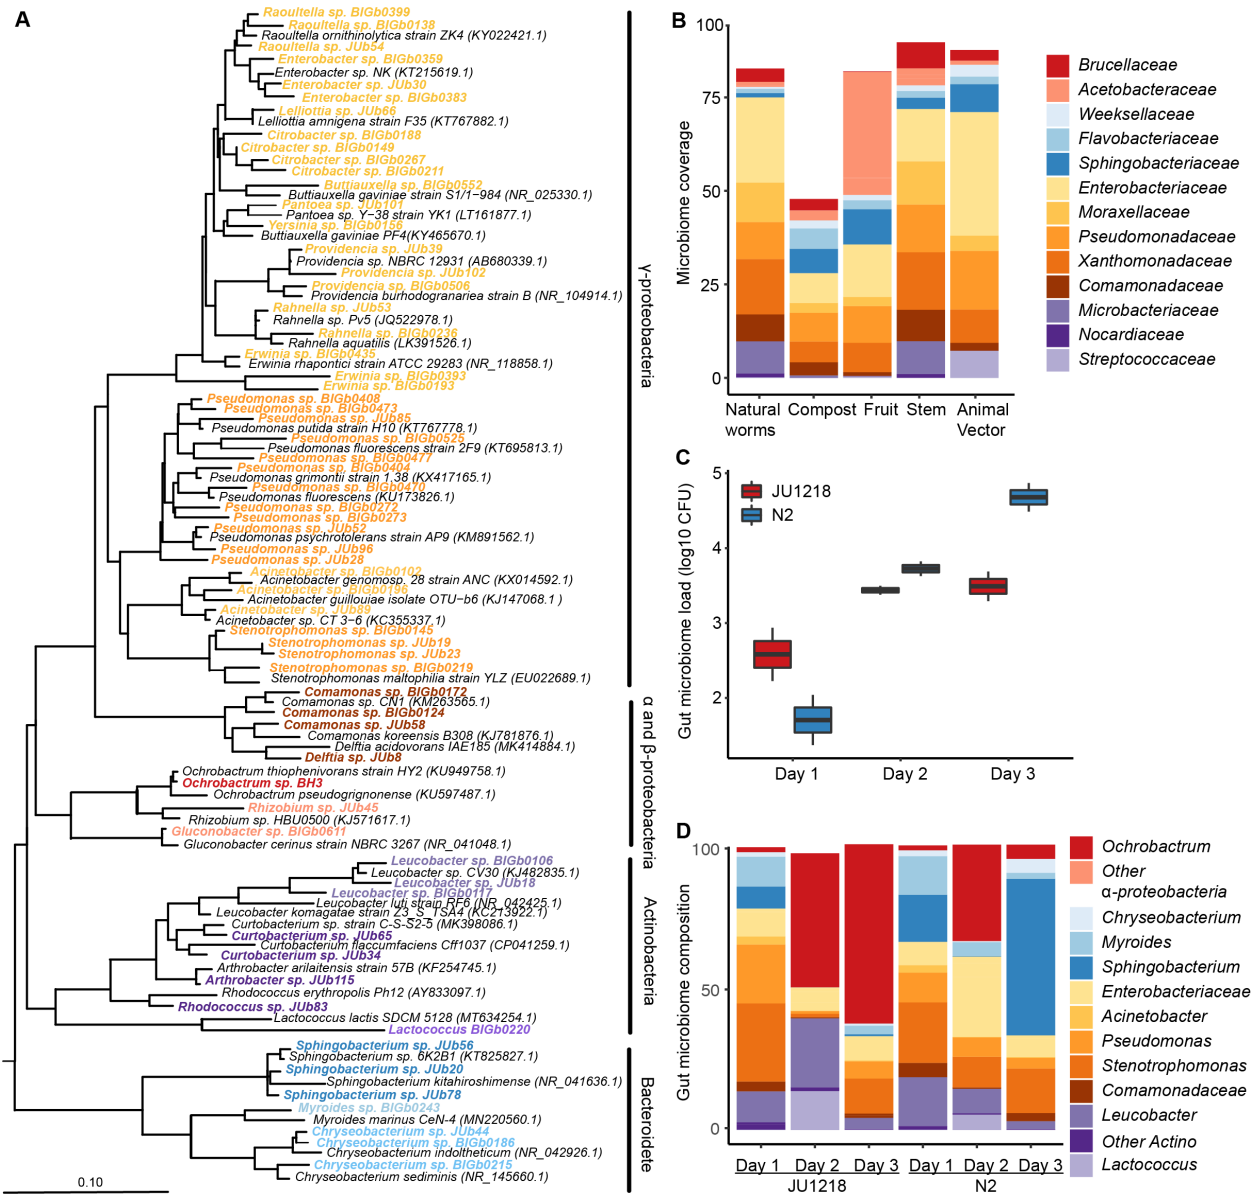

**Figure S1. Establishment of gut microbiome analysis pipeline in *C. elegans*, Related to Table 1.**

**A.** Phylogenetic tree is based on the full length of 16S rRNA genes of bacterial strains in this study using maximum likelihood method (Jukes–Cantor correction; see **Table 1** and **Data S1AA**). BIGbiome strains are highlighted in bold and colored by corresponding genus. 16S rRNA gene sequence from *Synechococcus* sp. PCC7902 (AF216946) was used as an outgroup. **B.** BIGbiome strains represent from 49-90% of core microbiome families in *C. elegans* natural habitats. See also **Data S1D**. **C.** Gut microbiome colonization increases from day 1 to day 3 adulthood in *C. elegans* N2 and JU1218 strains. **D.** Gut microbiome composition of N2 and JU1218 is similar on day 1 then diverges on Day 3 adulthood. Relative microbiome abundance was calculated from biological duplicates. See also **Data S1E**.

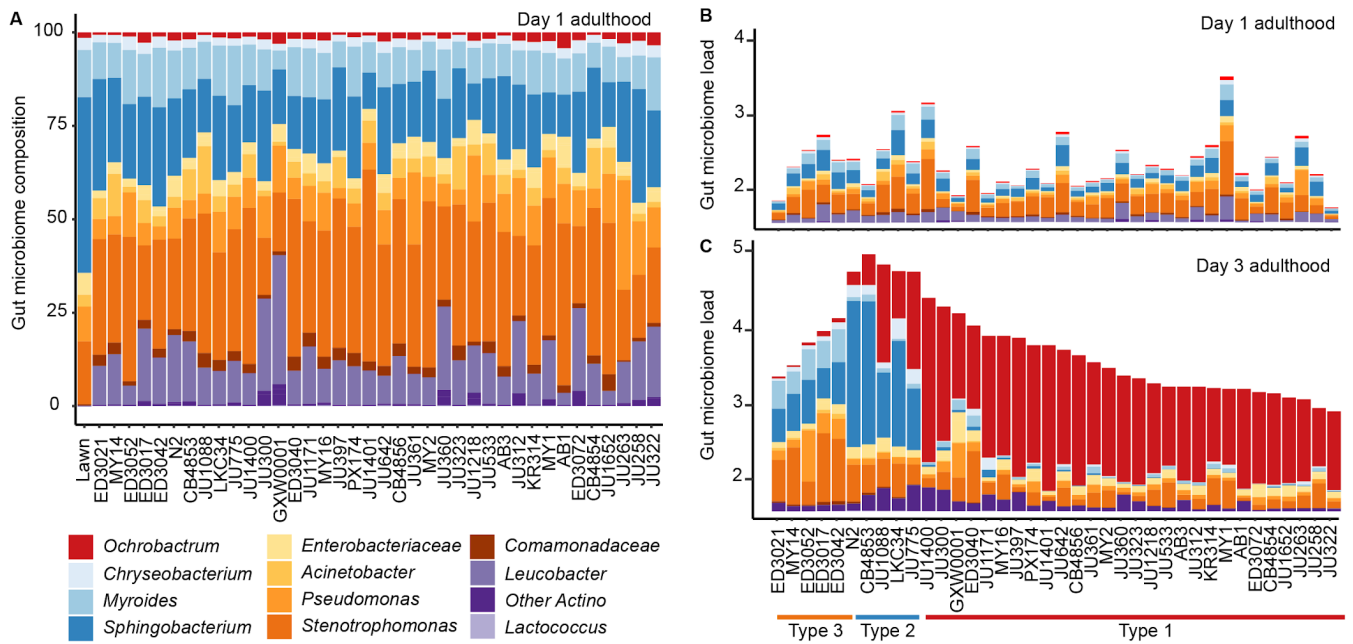

**Figure S2. Minimal differences in *C. elegans* gut microbiomes at day 1 of adulthood, Related to Figure 1.**

**A.** Gut microbiome composition of 38 *C. elegans* strains on Day 1 adulthood. Relative microbiome abundance was calculated from biological duplicates for each strain. **B.** Similar gut microbiome colonization levels of 38 *C. elegans* strains on Day 1 adulthood. Bar represented the mean calculated from biological duplicates for each strain. **C.** Gut microbiome colonization of 38 *C. elegans* strains on Day 3 adulthood. Type 2 strains, including lab-adapted N2 strain, carry on average a log higher gut microbiome load compared to Type 1 and 3 strains. Gut microbiome composition and load are calculated from the mean of biological duplicates for each strain. See also **Data S1A** and **Figure 1B-C**.

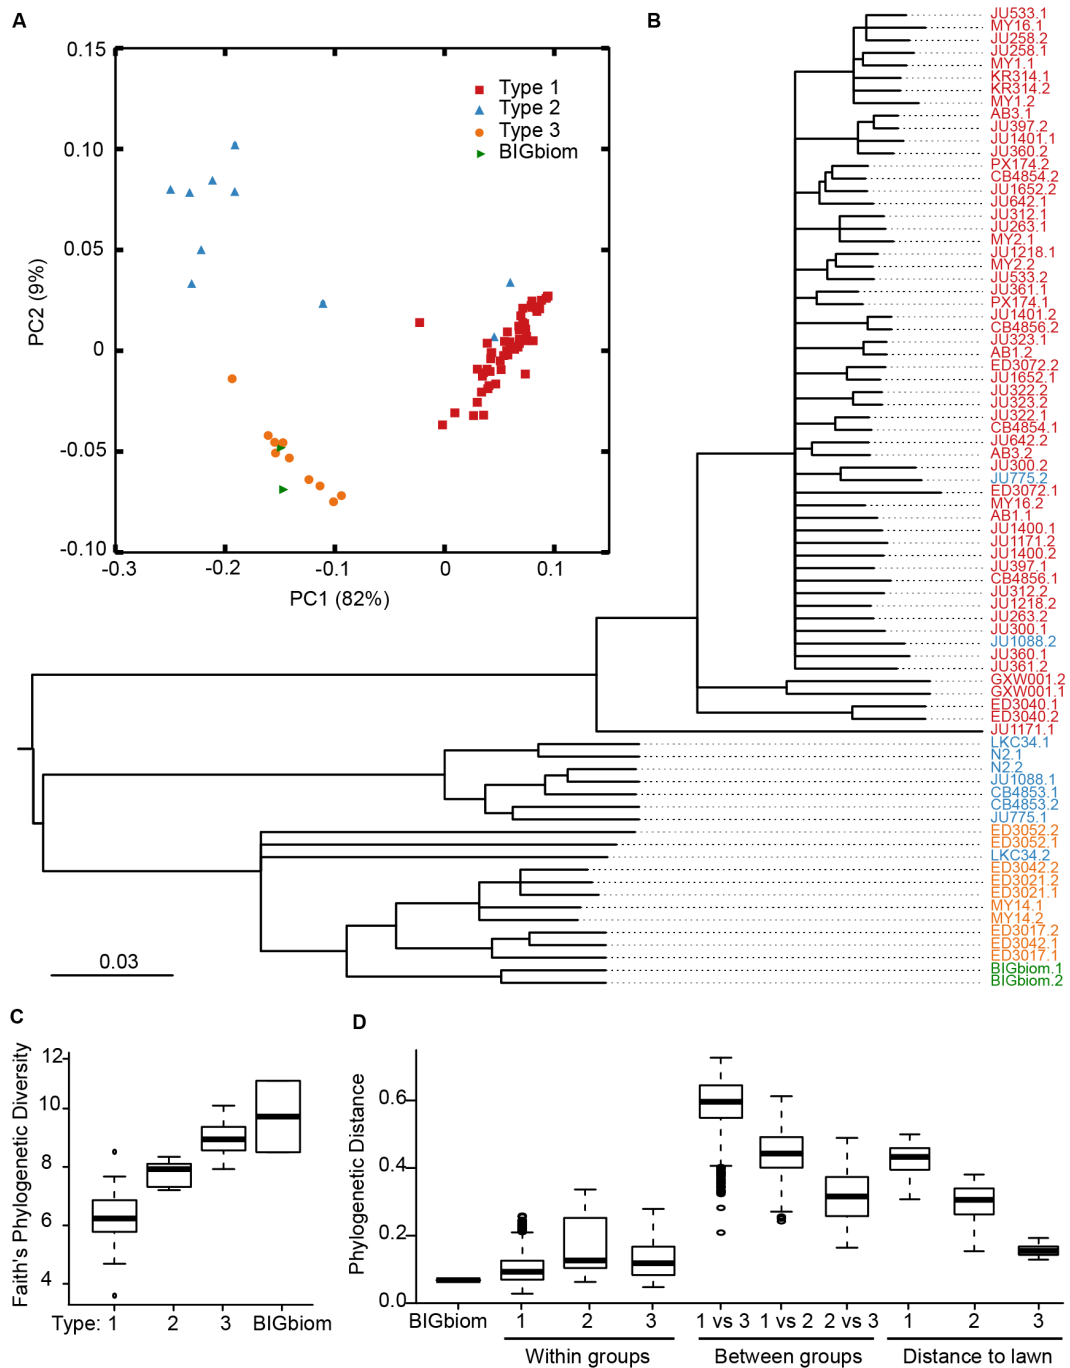

**Figure S3. Microbiome diversity on day 3 of adulthood, Related to Figure 1.**

**A.** PCoA of the microbiome composition of 38 *C. elegans* strains in Day 3 adulthood. **B.** Weighted jackknife clustering of microbiome composition of 38 *C. elegans* strains in Day 3 adulthood (colored by microbiome types). Replicates are shown under the same strain name. **C.** Box-whisker plot of Faith's phylogenetic diversity for each of the three microbiome types and BIGbiome lawn. See also **Data S1C**. **D.** Box-whisker plot of weighted UniFRAC distance between the three microbiome types and BIGbiome lawn.

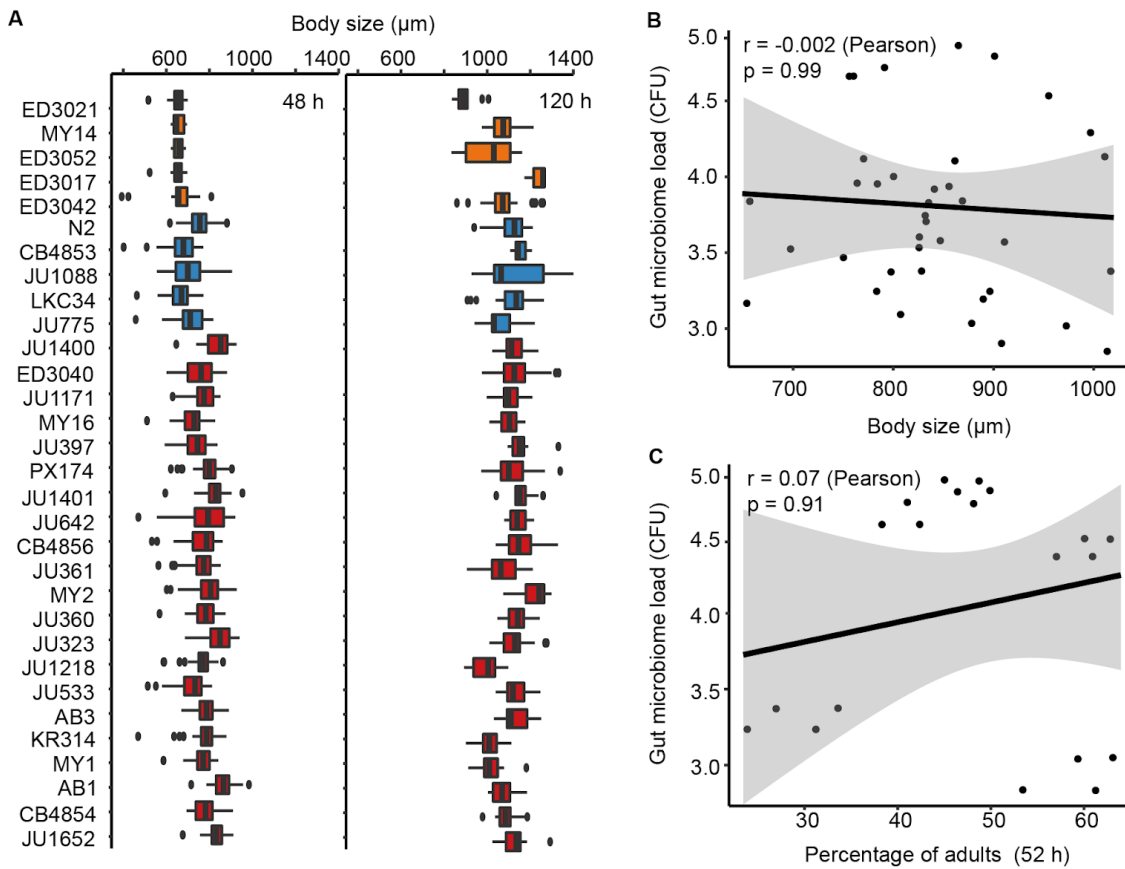

**Figure S4. Gut microbiome load does not correlate with host development and body size, Related to Figure 3.**

**A.** Box-whisker plot of body size of 38 *C. elegans* strains on day 1 and day 3 adulthood on BIGbiome. See also **Figure 3C** and **Data S1G**. **B.** No correlation observed between gut microbiome colonization and percentage of adults at 52 h post L1s ( $r = -0.002$ ,  $p = 0.99$ ). **C.** No correlation observed between gut microbiome colonization and worm body size at 48 h post L1s ( $r = 0.07$ ,  $p = 0.91$ ).

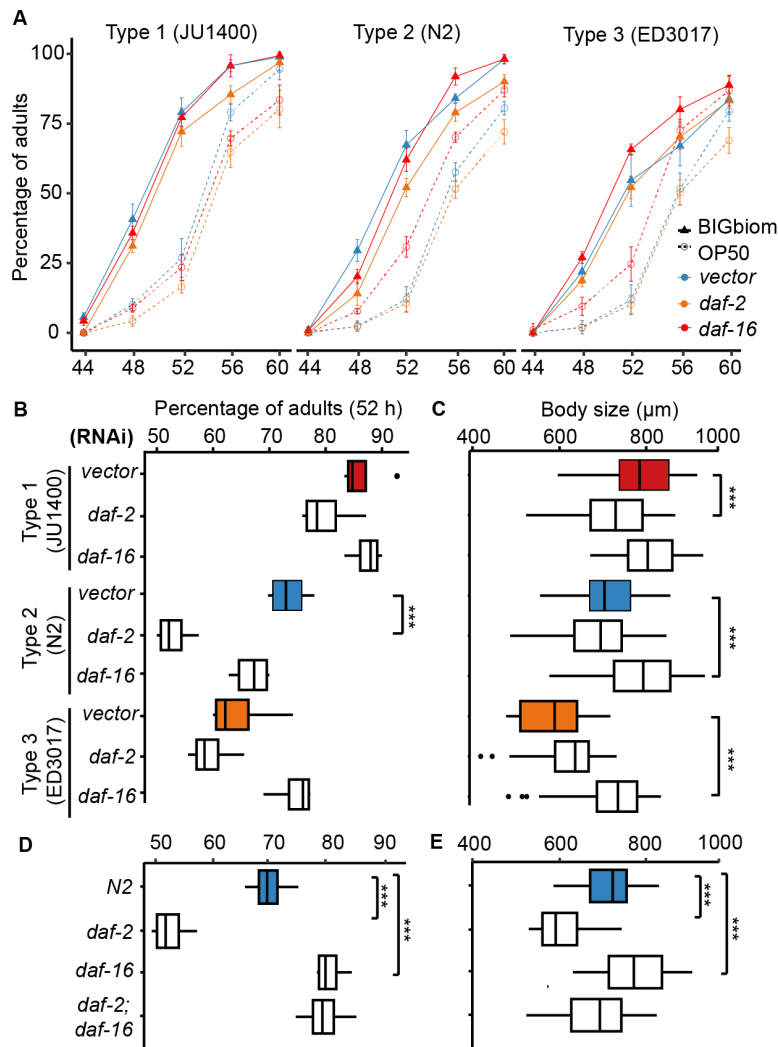

**Figure S5. Development and body size of *daf-2* and *daf-16* mutants on BIGbiome, Related to Figure 5.**

Additional experiments related to **Figure 5**. **A**. Developmental curves of *daf-2* and *daf-16* RNAi knockdown in representative microbiome type strains grown on the BIGbiome and *E. coli* OP50. Percentage of adults are represented as mean  $\pm$  SD with 4 replicates for each condition. **B**. Box-whisker plot of adult percentages of vector (n=4), *daf-2* (n=4), *daf-16* (n=4) knockdown in representative strains of the three microbiome types at 52 h post L1 stage. See also **Data S1Q**. **C**. Box-whisker plot of body size of vector, *daf-2*, *daf-16* knockdown mutants in representative strains of the three microbiome types at 48 h post L1 stage. See also **Data S1O**. **D**. Box-whisker plot of adult percentages of N2, *daf-2*(*e1370*), *daf-16*(*mgDf50*), and *daf-16*(*mgDf50*);*daf-2*(*e1370*) at 52 h post L1 stage (n=4 for each condition). See also **Data S1R**. **E**. Box-whisker plot of body size of N2, *daf-2*(*e1370*), *daf-16*(*mgDf50*), and *daf-16*(*mgDf50*);*daf-2*(*e1370*) at 48 h post L1 stage.

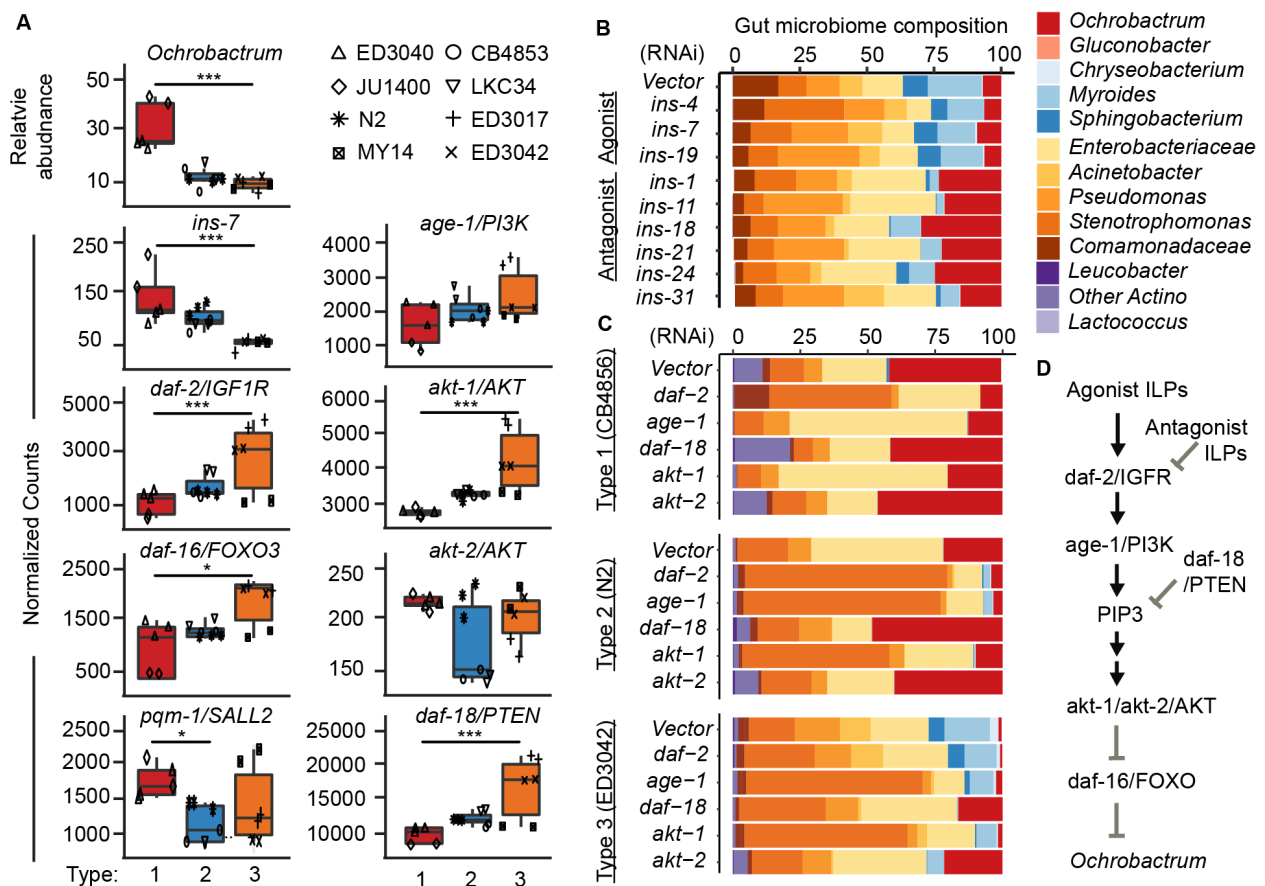

**Figure S6. Key insulin signaling pathway genes that mediate recruitment of *Ochrobactrum*, Related to Figure 4.**

**A.** Boxplots showing absolute abundance of *Ochrobactrum*, and expression of *ins-7*, *daf-2*, *daf-16*, *pqm-1*, *age-1*, *akt-1*, *akt-2*, and *daf-18* in each of the three microbiome types. Further analyses of datasets from **Data S1C** related to **Figure 4**. **B.** Gut microbiome sequence showed *Ochrobactrum* colonization increased in the intestinal specific RNAi strain JM45 with *ins-1*, *-11*, *-18*, *-21*, *-24*, *-31*(RNAi). See also **Data S1S**. **C.** *Ochrobactrum* colonization in CB4856 (Type 1) decreased with *daf-2*(RNAi), *age-1*(RNAi), and *akt-1*(RNAi). In contrast, *Ochrobactrum* colonization increased in N2 (Type 2) and ED3042 (Type 3) with *daf-18*(RNAi) and *akt-2*(RNAi) shown by bulk gut microbiome sequence of the corresponding population. See also **Data S1T**. **(B,C)** Relative microbiome abundance is presented here as the mean of biological duplicates for each strain. **D.** Schematic diagram of insulin signaling pathway in *C. elegans*.

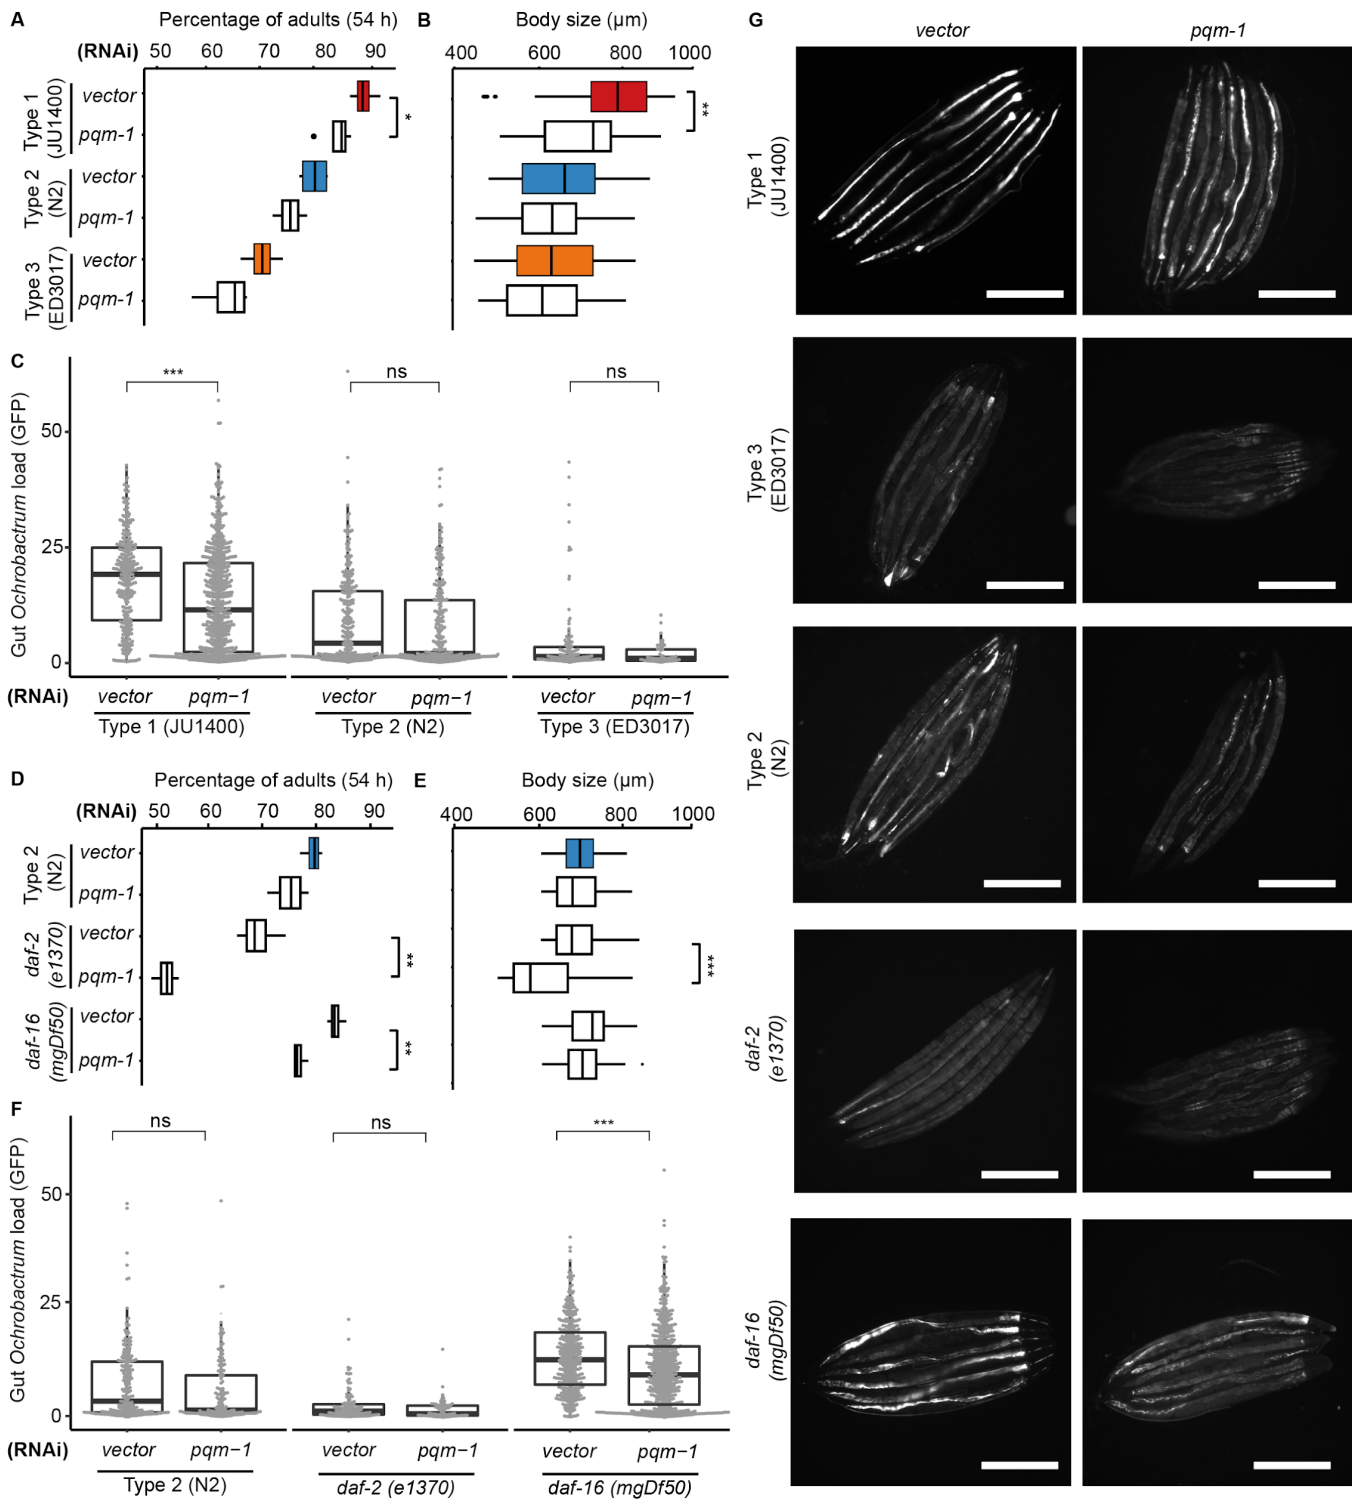

**Figure S7. Impact of *pqm-1* on host development, body size, and *Ochromobacter* colonization, Related to Figure 6.**

Further analyses of *pqm-1* related to **Figure 6**. **A**. Box-whisker plot of adult percentages of vector and *pqm-1* RNAi knockdown mutants in representative strains of the three microbiome types at 54 h post L1 stage. See also **Data S1V**. **B**. Box-whisker plot of body size of vector and *pqm-1* RNAi knockdown mutants in representative strains of the three microbiome types at 48 h post L1 stage. JU1400(vector): n=66, JU1400(*pqm-1* RNAi): n=85, N2(vector): n=79, N2(*pqm-1* RNAi): n=84, ED3017(vector): n=107, ED3017(*pqm-1*): n=68. See also **Figure 6AB**, **Data S1Y**. **C**. Box-whisker plot of GFP-*Ochromobacter*

colonization of vector and *pqm-1* RNAi knockdown mutants in representative strains of the three microbiome types at 120 h post L1 stage. JU1400(vector): n=306, JU1400(*pqm-1* RNAi): n=657, N2(vector): n=290, N2(*pqm-1* RNAi): n=283, ED3017(vector): n=114, ED3017(*pqm-1* RNAi): n=57. See also **Figure 6C, Data S1W**. **D**. Box-whisker plot of adult percentages of vector and *pqm-1* RNAi knockdown mutants in N2, *daf-2(e1370)*, and *daf-16(mgDf50)* at 54 h post L1 stage. See also **Data S1U**. **E**. Box-whisker plot of body size of vector and *pqm-1* RNAi knockdown mutants in N2, *daf-2(e1370)*, and *daf-16(mgDf50)* at 48 h post L1 stage. N2(vector): n=206, N2(*pqm-1* RNAi): n=267, *daf-2*(vector): n=300, *daf-2*(*pqm-1* RNAi): n=109, *daf-16*(vector): n=136, *daf-16*(*pqm-1* RNAi): n=179. See also **Figure 6DE, Data S1X**. **F**. Box-whisker plot of GFP-*Ochrobactrum* colonization of vector and *pqm-1* RNAi knockdown mutants in N2, *daf-2(e1370)*, and *daf-16(mgDf50)* at 120 h post L1 stage. N2(vector): n=237, N2(*pqm-1* RNAi): n=164, *daf-2*(vector): n=122, *daf-2*(*pqm-1* RNAi): n=75, *daf-16*(vector): n=412, *daf-16*(*pqm-1* RNAi): n=621. See also **Figure 6F, Data S1W**. (**B,E**) n represents the number of individual animals quantified by microscopic images. (**C,F**) n represents the number of individual animals quantified by Biosorter. P-values were generated from student's t-test (\*\*\*p<0.001, \*\*p<0.01, \*p<0.05). **G**. Representative images of GFP-*Ochrobactrum* colonization of vector and *pqm-1* RNAi knockdown mutants in Type 1(JU1400), Type 3(ED3017), Type 2(N2), *daf-2(e1370)*, and *daf-16(mgDf50)* at 120 h post L1 stage (Bar = 500  $\mu$ m). Complete set of images from **Figure 6E**.



| <b>Strains</b> | <b>City of isolation</b>      | <b>Country of isolation</b> | <b>Substrate of isolation</b> |
|----------------|-------------------------------|-----------------------------|-------------------------------|
| AB1            | Adelaide, South Australia     | Australia                   | NA                            |
| AB3            | Adelaide, South Australia     | Australia                   | NA                            |
| CB4853         | Altadena, California          | U.S.A.                      | NA                            |
| CB4854         | Altadena, California          | U.S.A.                      | NA                            |
| CB4856         | Hawaii                        | U.S.A.                      | Pineapple                     |
| ED3017         | Edinburgh                     | Scotland                    | Compost                       |
| ED3021         | Edinburgh                     | Scotland                    | Compost                       |
| ED3040         | Johannesburg, Gauteng         | South Africa                | Compost                       |
| ED3042         | Ceres, Western Cape           | South Africa                | Compost                       |
| ED3052         | Ceres, Western Cape           | South Africa                | Compost                       |
| ED3072         | Limuru, Kiambu West           | Kenya                       | Compost                       |
| GXW0001        | Wuhan                         | China                       | Kiwi                          |
| JU1088         | Kakegawa                      | Japan                       | Soil                          |
| JU1171         | Conception                    | Chile                       | Compost                       |
| JU1218         | Santeuil                      | France                      | Apple                         |
| JU1400         | Seville, Andalucia            | Spain                       | Orange                        |
| JU1401         | Carmona, Andalucia            | Spain                       | Snail                         |
| JU1652         | Montevideo                    | Uruguay                     | Compost                       |
| JU258          | Ribeiro Frio, Madeira         | Portugal                    | Compost                       |
| JU263          | Le Blanc, Indre               | France                      | Compost                       |
| JU300          | Le Blanc, Indre               | France                      | Compost                       |
| JU312          | Merlet, Lagorce (Ardeche)     | France                      | Snail                         |
| JU322          | Merlet, Lagorce (Ardeche)     | France                      | Snail                         |
| JU323          | Merlet, Lagorce (Ardeche)     | France                      | Snail                         |
| JU360          | Franconville (Val d'Oise)     | France                      | Compost                       |
| JU361          | Franconville (Val d'Oise)     | France                      | Compost                       |
| JU397          | Hermanville (Calvados)        | France                      | Compost                       |
| JU533          | Primel-Trigastrel (Finistere) | France                      | Compost                       |
| JU642          | Le Perreux sur Marne          | France                      | Compost                       |
| JU775          | Lisbon                        | Portugal                    | Fruit                         |
| KR314          | Vancouver, B.C.               | Canada                      | Compost                       |
| LKC34          | Madagascar                    | Madagascar                  | Palm seed                     |
| MY1            | Lingen, Emsland               | Germany                     | Compost                       |
| MY14           | Mecklenbeck, Munster          | Germany                     | Compost                       |
| MY16           | Mecklenbeck, Munster          | Germany                     | Compost                       |
| MY2            | Roxel, Munster                | Germany                     | Compost                       |
| N2             | Bristol                       | U.K.                        | Compost                       |
| PX174          | Lincoln City, Oregon          | U.S.A.                      | Compost                       |

**Table S1. List of *C. elegans* strains used in this study, Related to Figure 1.**

This table contains metadata related to *C. elegans* strains grown on BIGbiome001, including isolation locations and substrates. All strains used in **Figure 1** experiments, and representative strains used throughout the remainder of the study.

| Abundance Type | Chromosome | Interval             | -LOG10 (P-value) | Microbe                   | Variance Explained | # of Genes |
|----------------|------------|----------------------|------------------|---------------------------|--------------------|------------|
| Absolute       | II         | II:11915965-12279192 | 9.14             | <i>Gluconobacter</i>      | 63%                | 76         |
| Absolute       | II         | II:2707668-3460063   | 15.78            | <i>Gluconobacter</i>      | 33%                | 320        |
| Absolute       | IV         | IV:1941722-2759510   | 6.26             | <i>Gluconobacter</i>      |                    |            |
| Absolute       | V          | V:16336870-16718573  | 8.18             | <i>Gluconobacter</i>      | 18%                | 166        |
| Absolute       | III        | III:2173687-2578338  | 0.68             | <i>Leucobacter</i>        | 0%                 | 85         |
| Absolute       | III        | III:2173687-2578338  | 0.68             | <i>Enterobacteriaceae</i> | 1%                 | 85         |
| Absolute       | V          | V:18365057-18641205  | 6.02             | <i>Chryseobacterium</i>   | 17%                | 99         |
| Absolute       | X          | X:8998713-11420509   | 9.32             | <i>Chryseobacterium</i>   | 25%                | 778        |
| Absolute       | X          | X:14807446-16227725  | 6.28             | <i>Acinetobacter</i>      | 15%                | 477        |
| Relative       | II         | II:11915965-12279192 | 7.69             | <i>Gluconobacter</i>      | 56%                | 76         |
| Relative       | II         | II:12067145-12447805 | 6.3              | <i>Enterobacteriaceae</i> | 17%                | 106        |
| Relative       | III        | III:2494297-2803454  | 6.83             | <i>Curtobacterium</i>     | 28%                | 58         |
| Relative       | IV         | IV: 2357572-2772696  | 5.6              | <i>Curtobacterium</i>     | 4%                 |            |
| Relative       | IV         | IV: 3697125-4278131  | 5.6              | <i>Curtobacterium</i>     | 4%                 |            |
| Relative       | V          | V:13481602-14777699  | 6.02             | <i>Curtobacterium</i>     | 17%                | 505        |
| Relative       | V          | V:18810891-19550497  | 6.02             | <i>Curtobacterium</i>     | 17%                | 221        |
| Relative       | V          | V:18365057-18641205  | 5.69             | <i>Chryseobacterium</i>   | 17%                | 99         |
| Relative       | X          | X:9334761-11420509   | 5.69             | <i>Chryseobacterium</i>   | 17%                | 661        |

**Table S2. Summary of GWAS loci associated with bacterial taxa, Related to Figure 2.**

This table is related to **Figure 2B-C** and contains direct output information from the CeNDR GWAS tool including marker, chromosome, position, user-provided trait (microbe and abundance, in this case),  $\log_{10}(\text{p-value})$ , significance threshold (BF), binary signifier if the trait was above the BF score, *C. elegans* strain, value, allele, var.exp, start and stop position, peak position, peak identification, and interval size (see reference 82 for more information about the CeNDR tool and information outputs).

| Microbe                        | Correlation<br>(Body size) | P-value<br>(Body size) | Correlation<br>(growth rate) | P-value<br>(growth rate) |
|--------------------------------|----------------------------|------------------------|------------------------------|--------------------------|
| <b><i>Curtobacterium</i></b>   | <b>-0.48</b>               | <b>0.00</b>            | <b>-0.37</b>                 | <b>0.05</b>              |
| <i>Leucobacter</i>             | 0.04                       | 0.80                   | <b>0.49</b>                  | <b>0.00</b>              |
| <b><i>Arthrobacter</i></b>     | <b>-0.48</b>               | <b>0.00</b>            | <b>-0.80</b>                 | <b>0.00</b>              |
| <i>Rhodococcus</i>             | 0.06                       | 0.72                   | 0.06                         | 0.70                     |
| <b><i>Chryseobacterium</i></b> | <b>-0.39</b>               | <b>0.02</b>            | <b>-0.39</b>                 | <b>0.02</b>              |
| <b><i>Myroides</i></b>         | <b>-0.50</b>               | <b>0.00</b>            | <b>-0.75</b>                 | <b>0.00</b>              |
| <i>Sphingobacterium</i>        | <b>-0.38</b>               | <b>0.02</b>            | -0.22                        | 0.19                     |
| <i>Lactococcus</i>             | -0.12                      | 0.46                   | -0.19                        | 0.24                     |
| <b><i>Ochrobactrum</i></b>     | <b>0.49</b>                | <b>0.00</b>            | <b>0.74</b>                  | <b>0.00</b>              |
| <i>Gluconobacter</i>           | 0.01                       | 0.95                   | -0.10                        | 0.56                     |
| <b><i>Delftia</i></b>          | <b>-0.39</b>               | <b>0.02</b>            | <b>-0.73</b>                 | <b>0.00</b>              |
| <b><i>Limnohabitans</i></b>    | <b>-0.61</b>               | <b>0.00</b>            | <b>-0.45</b>                 | <b>0.00</b>              |
| <b><i>Ramlibacter</i></b>      | <b>-0.33</b>               | <b>0.04</b>            | <b>-0.73</b>                 | <b>0.00</b>              |
| <i>Citrobacter</i>             | 0.12                       | 0.47                   | -0.24                        | 0.15                     |
| <i>Enterobacter</i>            | <b>0.45</b>                | <b>0.00</b>            | 0.24                         | 0.15                     |
| <i>Erwinia</i>                 | 0.10                       | 0.54                   | 0.22                         | 0.19                     |
| <i>Providencia</i>             | -0.30                      | 0.07                   | <b>-0.73</b>                 | <b>0.00</b>              |
| <i>Raoultella</i>              | 0.13                       | 0.42                   | <b>-0.44</b>                 | <b>0.01</b>              |
| <i>Yersinia</i>                | 0.01                       | 0.93                   | <b>-0.51</b>                 | <b>0.00</b>              |
| <b><i>Acinetobacter</i></b>    | <b>-0.33</b>               | <b>0.04</b>            | <b>-0.81</b>                 | <b>0.00</b>              |
| <i>Pseudomonas</i>             | -0.20                      | 0.22                   | <b>-0.74</b>                 | <b>0.00</b>              |
| <b><i>Stenotrophomonas</i></b> | <b>-0.41</b>               | <b>0.01</b>            | <b>-0.87</b>                 | <b>0.00</b>              |

**Table S3. Pearson correlation of gut microbial abundance with host body size and developmental growth rate, Related to Figure 3.**

This table lists the Pearson correlation coefficient between microbial abundance on day 3 adults and two host phenotypes (developmental growth rate/body size) related to **Figure 3D**. p-value was computed at the level of 95% confidence interval. *Ochrobactrum* is the only microbial taxa with positive correlations with both host phenotypes ( $p < 0.05$ ). 9 other microbial taxa show negative correlations with both host phenotypes ( $p < 0.05$ ).
